# Supplementary material for: Spasticity treatment patterns among people with multiple sclerosis: a Swedish cohort study
Source: HighWire-hosted journal article supplement (doi:10.1136/jnnp-2022-329886), 2022-12-20
Supplement: jnnp-2022-329886supp006_data_supplement.pdf [file jnnp-2022-329886supp006_data_supplement.pdf]

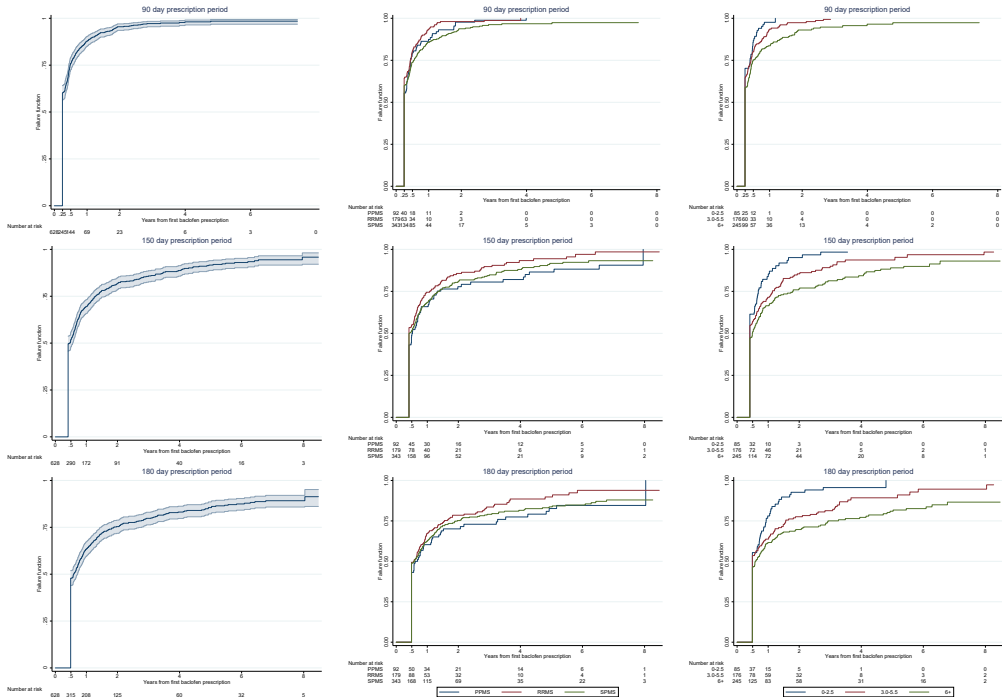

Supplementary Figure 1: Time to discontinuation of baclofen among people with prevalent multiple sclerosis stratified by disease course and Expanded Disability Severity Scale (EDSS). Left column, overall discontinuation. Middle column, discontinuation stratified by disease course when starting baclofen. Right column, discontinuation stratified by EDSS score when starting baclofen. Abbreviations: RRMS = Relapsing-remitting multiple sclerosis; SPMS = secondary progressive multiple sclerosis; PPMS = primary progressive multiple sclerosis.
