# Supplementary material for: Spasticity treatment patterns among people with multiple sclerosis: a Swedish cohort study
Source: HighWire-hosted journal article supplement (doi:10.1136/jnnp-2022-329886), 2022-12-20
Supplement: jnnp-2022-329886supp009_data_supplement.pdf [file jnnp-2022-329886supp009_data_supplement.pdf]

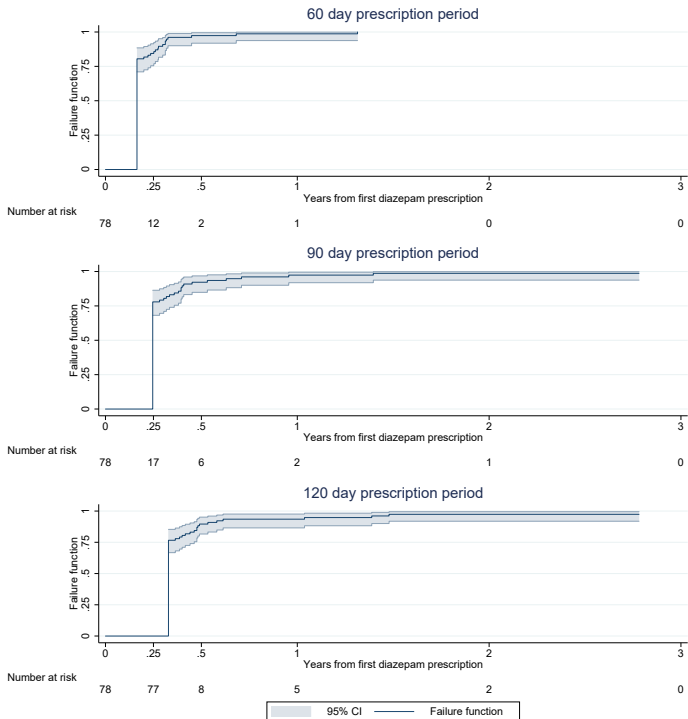

Supplementary Figure 4: Time to discontinuation of diazepam among people with incident multiple sclerosis who had diazepam as their first drug to treat possible spasticity.
